# Supplementary material for: A smartphone-readable barcode assay for the detection and quantitation of pesticide residues
Source: Royal Society of Chemistry journal article supplement (doi:10.1039/c5an00874c), 2015-01-01
Supplement: c5an00874c1.pdf [file c5an00874c1.pdf]

## Electronic Supplementary Information

for

## Smartphone-readable Barcode Assay for the Detection and Quantitation of Pesticide Residues

**Juan Guo,<sup>a,§</sup> Jessica X. H. Wong,<sup>b,§</sup> Caie Cui,<sup>a</sup> Xiaochun Li,<sup>a,\*</sup> and Hua-Zhong Yu<sup>a,b,\*</sup>**

<sup>a</sup> *Key Laboratory of Advanced Transducers and Intelligent Control Systems (Ministry of Education and Shanxi Province), College of Physics and Optoelectronic Engineering, Taiyuan University of Technology, Shanxi 030024, P.R. China*

<sup>b</sup> *Department of Chemistry, Simon Fraser University, Burnaby, British Columbia V5A 1S6, Canada*

<sup>§</sup> These authors contributed equally to this work.

\* Corresponding authors: lixiaochun@tyut.edu.cn (XL); hogan\_yu@sfu.ca (HY)

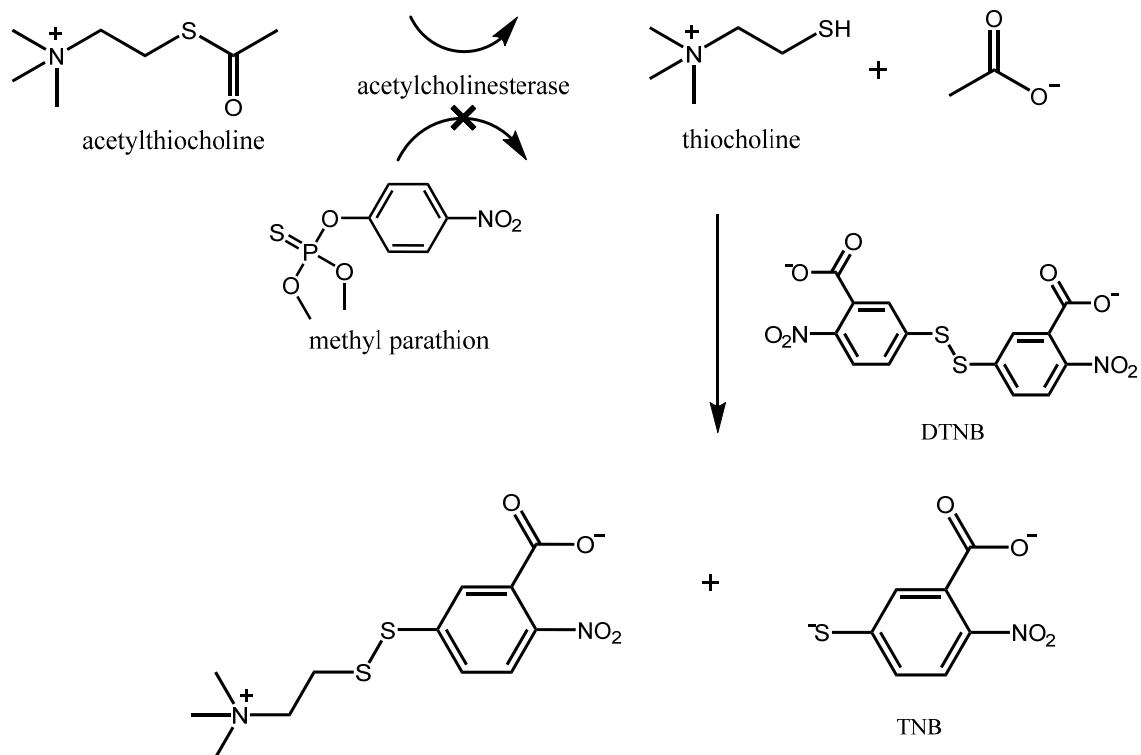

**Scheme S1:** Detection of methyl parathion based on the irreversible inhibition of the activity of acetylcholinesterase (AChE). AChE catalytically hydrolyzes acetylthiocholine iodide (ATCh) in phosphate buffer (pH = 8.0) to thiocholine that in turn dissociates dithio-bisnitrobenzoate (DTNB) to produce a yellow colored product (TNB).

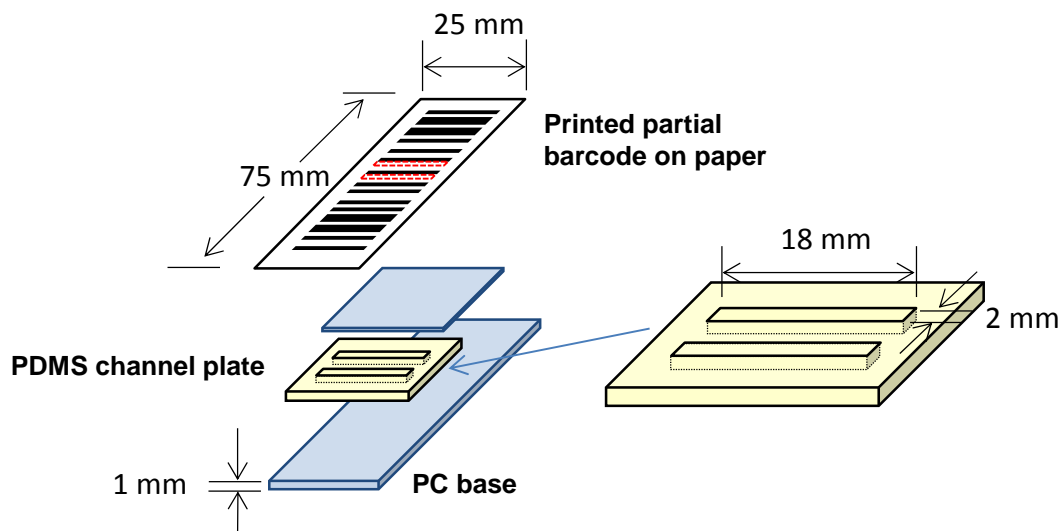

**Scheme S2:** Dimensions of the barcode assay chip (not to the actual scale); the positions of the channels are highlighted with red dashed lines.
